# Supplementary material for: Proton conductivity in ampullae of Lorenzini jelly
Source: PubMed Central journal article supplement — Sci Adv. 2016 May 13;2(5):e1600112. doi: 10.1126/sciadv.1600112 (PMC4928922; doi:10.1126/sciadv.1600112), 2016-05-13
Supplement: 1600112_SM.pdf [file 1600112_SM.pdf]

## Supplementary Materials for

### **Proton conductivity in ampullae of Lorenzini jelly**

Erik E. Josberger, Pegah Hassanzadeh, Yingxin Deng, Joel Sohn, Michael J. Rego, Chris T. Amemiya, Marco Rolandi

Published 13 May 2016, *Sci. Adv.* **2**, e1600112 (2016)

DOI: 10.1126/sciadv.1600112

#### **The PDF file includes:**

- fig. S1. Collection of AoL jelly.
- fig. S2. TGA of AoL jelly.
- fig. S3. Cross-species consistency of results.
- fig. S4. Control experiments on Nafion.
- table S1. Elemental analysis of AoL jelly as analyzed by Intertek Pharmaceutical.
- table S2. Room-temperature proton conductivities of Nafion and known biopolymers.

## Supplementary Materials

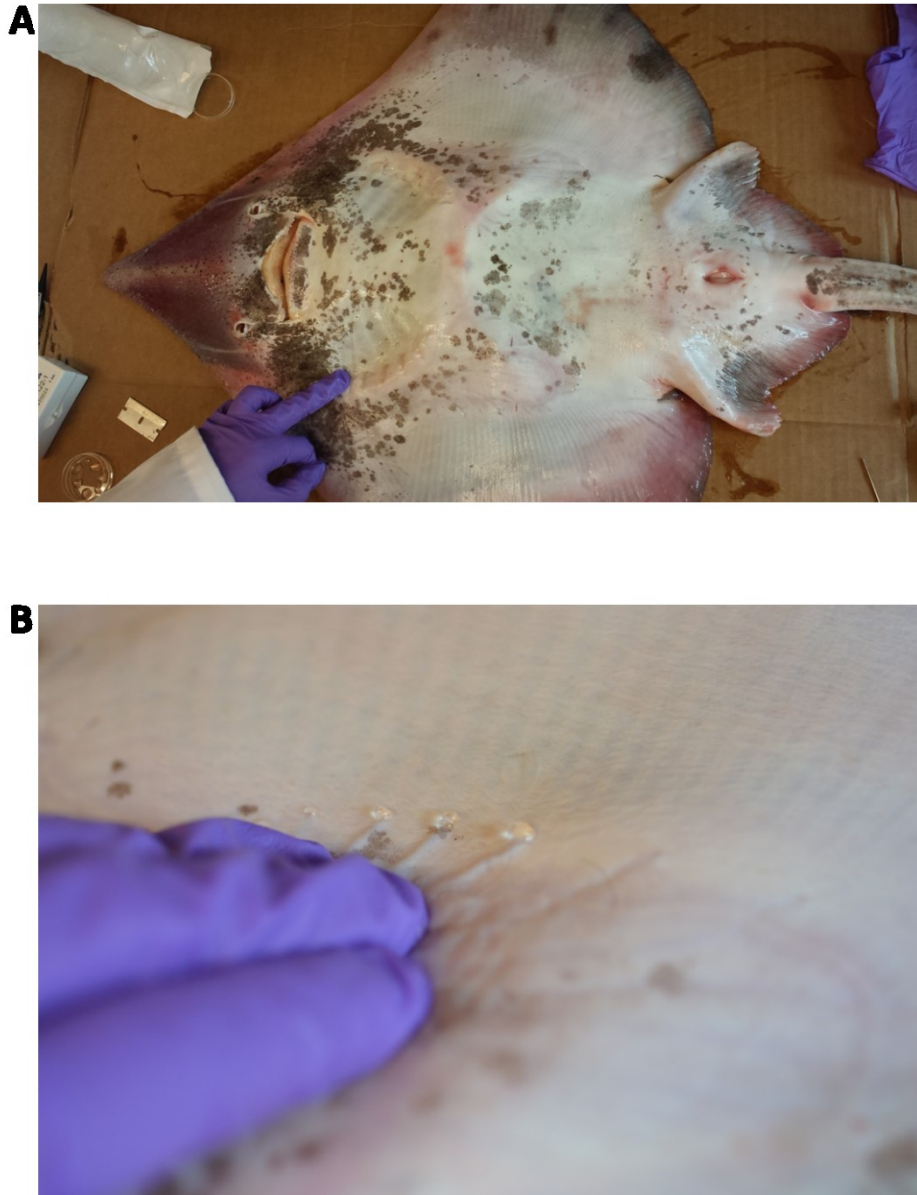

**fig. S1. Collection of AoL jelly.** (A) The ventral side of an adult skate, *Raja binoculata*. Finger points to a region that contains many Ampullae of Lorenzini. (B) Pressing along the canals causes AoL jelly to extrude from the pores. [Photo Credit: E. E. Josberger, University of Washington]

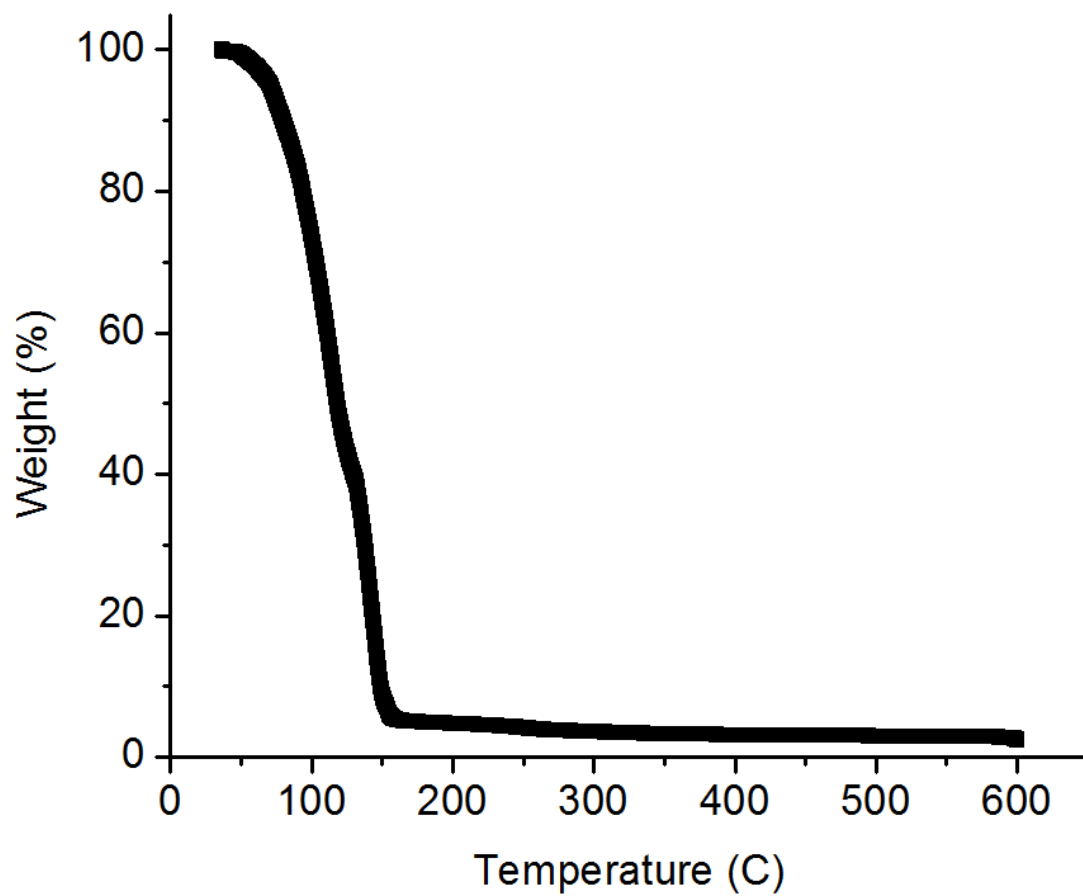

**fig. S2. TGA of AoL jelly.** 97% of the mass is lost between 47°C and 153°C, which corresponds to 97% water content of the AoL jelly.

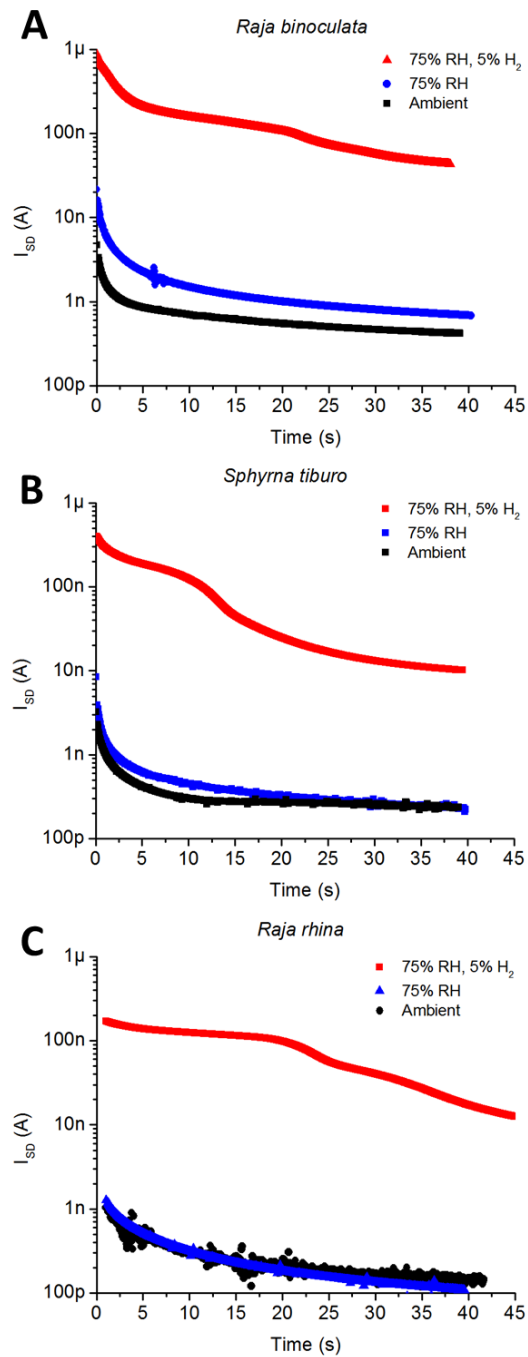

**fig. S3. Cross-species consistency of results.** Two-terminal DC measurements of ampullae jelly are similar to first approximation for the big skate (*Raja binoculata*, A), Bonnethead shark (*Sphyrna tiburo*, B), and long-nosed skate (*Raja rhina*, C).

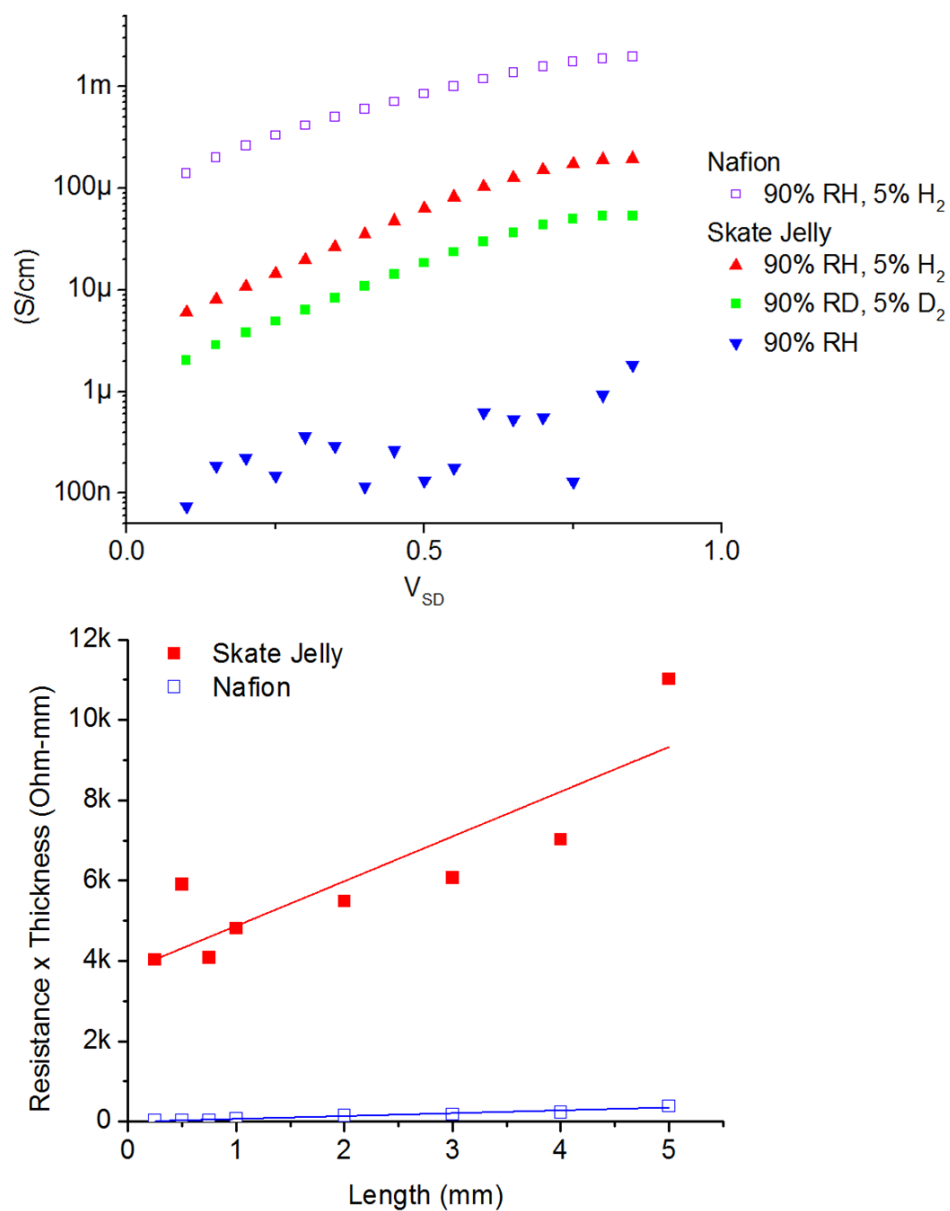

**fig. S4. Control experiments on Nafion.** (A) The conductivity of Nafion depends exponentially on the applied voltage. However, the magnitude of the conduction is much lower than the literature value of 78 mS/cm. This is likely due to fringing effects in the device geometry. (B) A TLM measurement of Nafion yields a conductivity of 28 mS/cm, compared with 2mS/cm for jelly. This is a slight decrease from the literature value of 78 mS/cm, which is attributed to sample preparation. The reported literature value is after immersion in heated sulfuric acid, while the measured sample was simply drop-cast from solution.

**table S1. Elemental analysis of AoL jelly as analyzed by Intertek Pharmaceutical.** The observed concentrations are similar to the average ion concentration in seawater (11).

| Chemical Species              | Observed Concentration |
|-------------------------------|------------------------|
| Cl                            | 1.84%                  |
| Na                            | 1.06%                  |
| SO <sub>4</sub> <sup>-2</sup> | 0.22%                  |
| K                             | 335 ppm                |
| Br <sup>-</sup>               | <100 ppm               |
| F <sup>-</sup>                | <100 ppm               |
| Li                            | <100 ppm               |
| NH <sub>4</sub>               | <100 ppm               |
| NO <sub>2</sub> <sup>-</sup>  | <100 ppm               |
| NO <sub>3</sub> <sup>-</sup>  | <100 ppm               |
| PO <sub>4</sub> <sup>-3</sup> | <100 ppm               |

The brief transient current observed during a hydrated DC measurement (Fig. 1B, blue) is likely due to the motion of these ions and capacitive charging at the contacts. To verify this hypothesis, we calculated the protonic and ionic interface capacitances and compared to the observed capacitance in the I<sub>SD</sub> vs t plot. The observed capacitance is found from  $C = Q/V$ , with Q the total charge and V the voltage. Integrating I<sub>SD</sub> of the blue trace in Fig. 1B as a function of time,  $Q = 22\text{nC}$  at 1V.  $C_{\text{ISD}} = Q/V = 22\text{nF}$ .

The contacts are blocking Na<sup>+</sup>, Cl<sup>-</sup> ions and H<sup>+</sup> and are transparent to electrons.

We the H<sup>+</sup> interface capacitance for the Debye layer as

$$C = \epsilon A / \lambda_D \quad (\text{eq. 1})$$

A= contact area,  $\epsilon$ = permittivity, and  $\lambda_D$ =Debye length

$$\lambda_D = (\epsilon * k_B T / 2 q^2 n)^{1/2} \quad (\text{eq. 2})$$

$k_B$ =Boltzmann's constant, T=temperature, q = fundamental charge, and n = charge carrier density.

Estimating the proton mobility to be  $5\text{E-}3 \text{ cm}^2 / \text{V s}$  [the same as Maleic Chitosan (12)], we use  $\sigma = qn\mu$  to find  $n = 2*10^{18} \text{ cm}^{-3}$ . Estimating the permittivity to be  $\epsilon = 10\epsilon_0$ , we calculate  $\lambda_D \approx 2\text{nm}$ .

For a contact area of 30um by 500um, the total H<sup>+</sup> capacitance, C<sub>H+</sub>= 0.6nF. Protons cannot be solely responsible for the observed charging using Pd contacts.

We calculate the ionic (Na<sup>+</sup> and Cl<sup>-</sup>) interface capacitance using a similar procedure. Summing the Na<sup>+</sup> and Cl<sup>-</sup> ions gives a total ion concentration of 3% (3 ions per 100 water molecules). We convert this to ions/cm<sup>-3</sup> using:

$$n = (\text{ions/water}) * \rho / m \approx 10^{21} \text{ cm}^{-3} \quad (\text{eq. 3})$$

with  $\rho$  the density of water (1 g/cm<sup>-3</sup>) and  $m$  the mass of a water molecule ( $\approx 3 * 10^{-23}$  g).

Using eq. 1 and eq. 2, the ionic capacitance C<sub>NaCl</sub>=13nF. Since there are two such interfaces in this device (source and drain), the total system capacitance is estimated to be 26nF. The observed charging capacitance at the contact (22nF) is consistent with Na<sup>+</sup> and Cl<sup>-</sup>, not only H<sup>+</sup>.

We note that the true material permittivity and mobility are unknown. In addition, this estimate ignores any possible bulk polarization capacitance in the material. Therefore, the results should be considered only a rough approximation to the true values.

**table S2. Room-temperature proton conductivities of Nafion and known biopolymers.**

| <b>Material</b>           | <b>Conductivity (mS/cm)</b> |
|---------------------------|-----------------------------|
| Nafion(21)                | 78                          |
| <b>AoL Jelly</b>          | <b>1.8 ± 0.9</b>            |
| Maleic Chitosan(12)       | 0.7                         |
| Reflectin(28)             | 0.1                         |
| Bovine Serum Albumin (23) | 0.05                        |
| Melanin(16)               | 0.02                        |
